# Supplementary material for: Inosine is an alternative carbon source for CD8+-T-cell function under glucose restriction
Source: PubMed Central journal article supplement (PMC7371628; doi:10.1038/s42255-020-0219-4), 2020-06-15
Supplement: 42255_2020_219_MOESM1_ESM.pdf [file 42255_2020_219_MOESM1_ESM.pdf]

In the format provided by the authors and unedited.

# Inosine is an alternative carbon source for CD8<sup>+</sup>-T-cell function under glucose restriction

Tingting Wang <sup>1,8</sup>, J. N. Rashida Gnanaprakasam<sup>1,8</sup>, Xuyong Chen<sup>1</sup>, Siwen Kang <sup>1</sup>, Xuequn Xu<sup>1</sup>, Hua Sun<sup>2</sup>, Lingling Liu<sup>1</sup>, Hayley Rodgers<sup>1</sup>, Ethan Miller<sup>1</sup>, Teresa A. Cassel<sup>3</sup>, Qiushi Sun<sup>3</sup>, Sara Vicente-Muñoz<sup>3</sup>, Marc O. Warmoes<sup>3</sup>, Penghui Lin<sup>3</sup>, Zayda Lizbeth Piedra-Quintero<sup>4</sup>, Mireia Guerau-de-Arellano<sup>4</sup>, Kevin A. Cassady<sup>1</sup>, Song Guo Zheng<sup>5</sup>, Jun Yang <sup>6</sup>, Andrew N. Lane <sup>3</sup>, Xiaotong Song <sup>2,7</sup> ✉, Teresa W.-M. Fan <sup>3</sup> ✉ and Ruoning Wang <sup>1</sup> ✉

<sup>1</sup>Center for Childhood Cancer & Blood Diseases, Hematology/Oncology & BMT, Abigail Wexner Research Institute at Nationwide Children's Hospital, Ohio State University, Columbus, OH, USA. <sup>2</sup>The Center for Cell and Gene Therapy, Baylor College of Medicine, Houston, TX, USA. <sup>3</sup>Center for Environmental and Systems Biochemistry, Department of Toxicology and Cancer Biology, Markey Cancer Center, University of Kentucky, Lexington, KY, USA. <sup>4</sup>School of Health and Rehabilitation Sciences, Division of Medical Laboratory Science, College of Medicine, Wexner Medical Center, Ohio State University, Columbus, OH, USA. <sup>5</sup>Division of Rheumatology and Immunology, Department of Internal Medicine at Ohio State University of Medicine and Wexner Medical Center, Columbus, OH, USA. <sup>6</sup>Department of Surgery, St Jude Children's Research Hospital, Memphis, TN, USA. <sup>7</sup>Icell Kealex Therapeutics, Houston, TX, USA. <sup>8</sup>These authors contributed equally: T. Wang, J. N. R. Gnanaprakasam. ✉e-mail: [shautong.song@icellkealex.com](mailto:shautong.song@icellkealex.com); [twmfan@gmail.com](mailto:twmfan@gmail.com); [ruoning.wang@nationwidechildrens.org](mailto:ruoning.wang@nationwidechildrens.org)

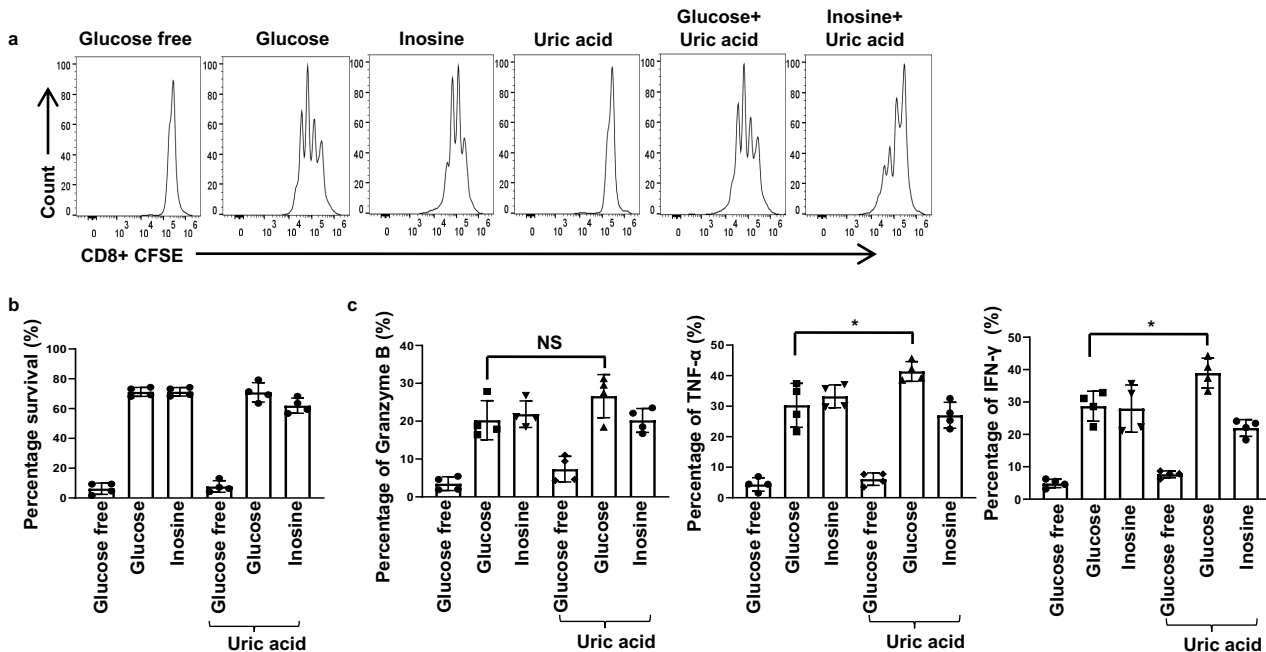

**Supplementary Figure 1. Uric acid is not the downstream effector metabolite of inosine.** (a-c) Naive CD8<sup>+</sup> T cells from C57BL/6 mice were activated by plate bound anti-CD3 and anti-CD28 antibodies and differentiated in the indicated conditional media in the presence and absence of uric acid (1mM) for 4 days. (a) Cell proliferation (CFSE), (b) cell survival (7AAD), and (c) indicated intracellular effector molecules were determined by FACS. Data are presented as mean  $\pm$  SD (n=4). (c) NS,  $P=0.1477$ ; \*,  $P=0.0307$  and  $0.0205$  for Granzyme B, TNF- $\alpha$ , and IFN- $\gamma$  for Glucose versus Glucose+Uric acid by unpaired two-tailed t-test. Data are representative of three independent experiments. Sample size (n) represents biologically independent samples (b-c).

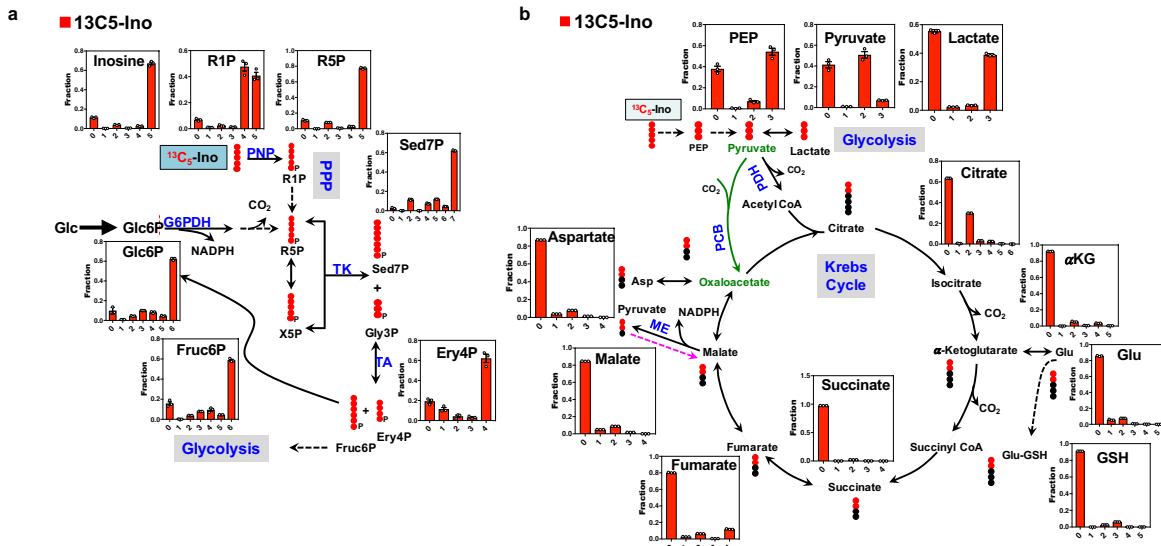

**Supplementary Figure 2. Incorporation of the ribose subunit of inosine into the central carbon metabolism in the presence of glucose in human T effector cells.** Active human T cells were incubated in media containing both  $^{13}\text{C}_5\text{-Inosine}$  and  $[6,6\text{-D}_2\text{-Glucose}]$  for 24 h, extracted as described in methods, and analyzed for the incorporation of  $^{13}\text{C}_5\text{-Ino}$  in the presence of glucose into PPP metabolites (a) and glycolytic/Krebs cycle metabolites (b) by IC-UHR-FTMS. Data are presented as mean  $\pm$  SEM (n=3). All symbols and abbreviations are as described in **Figure 2**. Numbers in the X-axis represent those of  $^{13}\text{C}$  atoms in given metabolites.

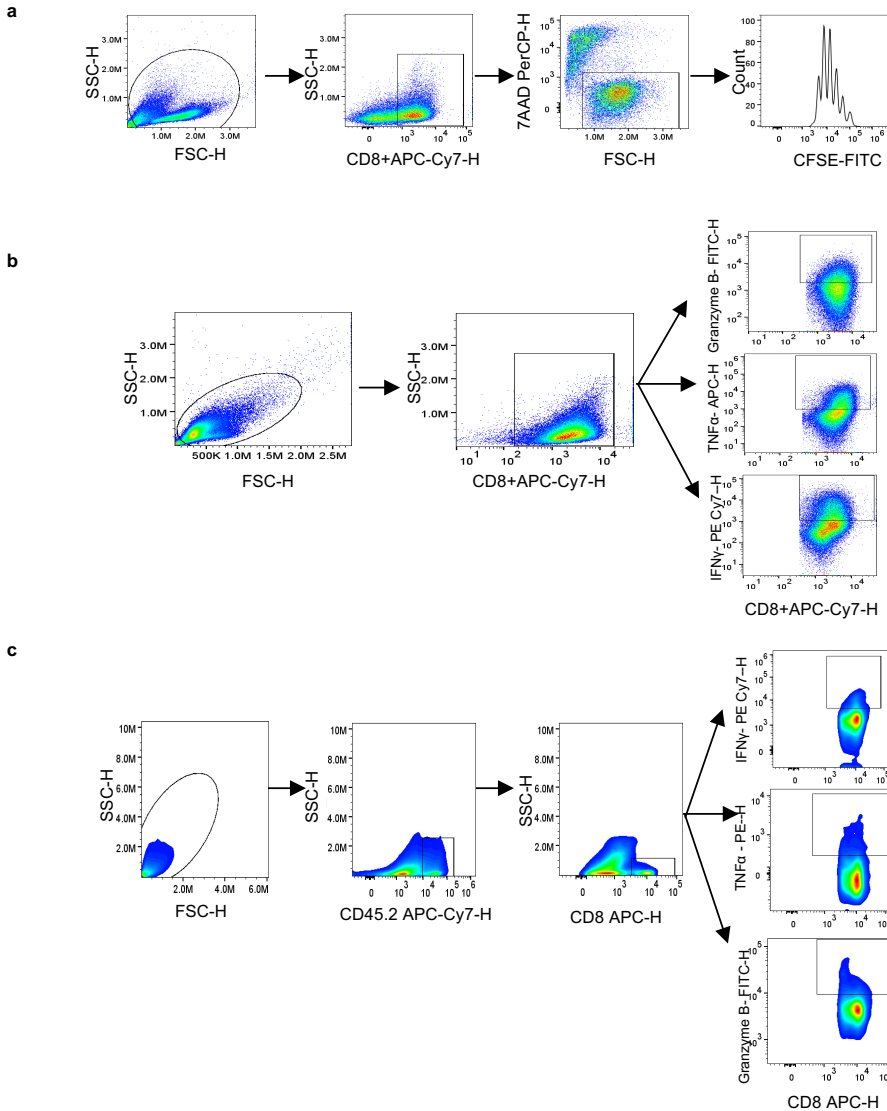

**Supplementary Figure 3. Gating strategy for analysis of (a) CD8+ T cell proliferation (b) intracellular cytokines and effector molecule expression (c) tumor infiltrated effector T cells and intracellular cytokines.**

**Supplementary Table 1**

| <b>Antibody</b>                                                      | <b>Cat#/Vendor</b>                       |
|----------------------------------------------------------------------|------------------------------------------|
| Mouse anti-CD3 mAb                                                   | BE0001-1, BioXcell                       |
| Mouse anti-CD28 mAb                                                  | BE0015-1, BioXcell                       |
| Anti mouse CD8-APC-Cy7                                               | 100714, Biolegend                        |
| Anti human/mouse Granzyme B-FITC                                     | 515403, Biolegend                        |
| Anti mouse TNF- $\alpha$ - APC                                       | 17-7321-82, eBioscience                  |
| Anti mouse IFN- $\gamma$ - PE-Cy7                                    | 25-7319-82, eBioscience                  |
| Anti-human CD8 $\alpha$ Antibody - APC-Cy7                           | 300926, Biolegend                        |
| Anti-human TNF- $\alpha$ -PE                                         | 502909, Biolegend                        |
| Anti-human IFN- $\gamma$ - PE-Cy7                                    | 506518, Biolegend                        |
| Anti mouse CD45.2 - PerCP-Cyanine5.5                                 | 45-0454-82, eBioscience                  |
| InVivoMAb anti m PD-L1                                               | BE0101, BioXcell                         |
| InVivoMAb anti m PD-1                                                | BE0146, BioXcell                         |
| Anti-human CD3 (OKT-3)                                               | BE0001, BioXcell                         |
| Anti-human/monkey CD28.2                                             | BE0291, BioXcell                         |
| anti-PNP                                                             | sc-271890, Santa Cruz                    |
| anti-actin                                                           | sc-47778, Santa Cruz                     |
| <b>Reagents</b>                                                      | <b>Cat#/Vendor</b>                       |
| Recombinant human IL-2                                               | 200-02, Peprotech                        |
| Recombinant murine IL-2                                              | 212-12, Peprotech                        |
| Cell Stimulation Cocktail (plus protein transport inhibitors) (500X) | 00-4975-93, eBioscience                  |
| carboxyfluorescein diacetate succinimidyl ester(CFSE)                | Invitrogen                               |
| 7-amino-actinomycin D(7AAD)                                          | 420404, Biolegend                        |
| D-(+)-Glucose                                                        | G7021, Sigma-Aldrich                     |
| Inosine                                                              | I4125, Sigma-Aldrich                     |
| Adenosine                                                            | 164040050, ACROS                         |
| D-(+)-Glucose                                                        | G7021, Sigma-Aldrich                     |
| RPMI 1640 Medium, No Glucose                                         | 11-879-020, Gibco                        |
| Retronectin                                                          | T100, Takara/clontech                    |
| Human gp100                                                          | RP20344, GenScript                       |
| Forodesine Hydrochloride                                             | HY-16209, MedChem Express                |
| <sup>13</sup> C <sub>6</sub> -Glucose                                | CLM-1396, Cambridge Isotope Lab          |
| <sup>13</sup> C <sub>6</sub> -Inosine                                | NUC-072, OMCIRON                         |
| D-GLUCOSE (6,6-D2, 99%)                                              | DLM-349, Cambridge Isotope Lab           |
| <sup>14</sup> C <sub>2</sub> -L-glutamine                            | ART0115, American Radiolabeled Chemicals |
| [9,10- <sup>3</sup> H]-palmitic acid                                 | MT 845, Moravek                          |
| [2,8- <sup>3</sup> H]-inosine                                        | MT 678, Moravek                          |
| [2,8- <sup>3</sup> H]-adenosine                                      | MT 793, Moravek                          |
| Etomoxir                                                             | 11969, Caymen                            |
| Methotrexate                                                         | 13960100, Caymen                         |
| Calcein AM                                                           | C3099, Invitrogen                        |
| Sodium pyruvate solution                                             | S8636, Sigma-Aldrich                     |
| Uric Acid                                                            | 69-93-2, Alfa Aesar                      |
| hypoxathine                                                          | H9636, Sigma-Aldrich                     |
| ribose-1-phosphate                                                   | 83866, Sigma-Aldrich                     |
| perchloric acid                                                      | 311413, Sigma-Aldrich                    |
| sucrose                                                              | S7930, Sigma-Aldrich                     |
| 1-Bromododecane                                                      | 106912500, ACROS                         |
| CD45R(B220) microbeads, mouse                                        | 5150309030, Miltenyi Biotec              |
| Naive CD8+ T cell isolation kit,mouse                                | 130-096-543, Miltenyi Biotec             |
| MojoSort™ Mouse CD8 Naive T Cell Isolation Kit                       | 480044, Biolegend                        |
| MojoSort™ Human CD3 T Cell Isolation Kit                             | 480021, Biolegend                        |

**Supplementary Table 2**

| <b>Data sets</b>  | <b>Asterisks</b> | <b>P value (13C5-Iso versus 13C5-Iso+Foro)</b> |
|-------------------|------------------|------------------------------------------------|
| 13C2-Citrate      | ***              | 8.18755E-05                                    |
| 13C3-Citrate      | ***              | 2.96234E-06                                    |
| 13C4-Citrate      | ***              | 2.15878E-06                                    |
| 13C5-Citrate      | ***              | 4.70221E-06                                    |
| 13C6-Citrate      | ***              | 6.49864E-06                                    |
| 13C2- $\alpha$ KG | **               | 0.00431901                                     |
| 13C3- $\alpha$ KG | **               | 0.001316994                                    |
| 13C4- $\alpha$ KG | ***              | 0.000277638                                    |
| 13C5- $\alpha$ KG | ***              | 0.000550666                                    |
| 13C1-Glu          | ***              | 6.64732E-06                                    |
| 13C2-Glu          | ***              | 7.0498E-11                                     |
| 13C3-Glu          | ***              | 8.341E-12                                      |
| 13C4-Glu          | ***              | 3.41648E-10                                    |
| 13C5-Glu          | ***              | 1.6913E-09                                     |
| 13C1-GSH          | ***              | 1.63113E-05                                    |
| 13C2-GSH          | ***              | 1.71179E-10                                    |
| 13C3-GSH          | ***              | 4.47E-13                                       |
| 13C4-GSH          | ***              | 4.553E-12                                      |
| 13C5-GSH          | ***              | 2.52106E-10                                    |
| 13C1-Succinate    | *                | 0.018325258                                    |
| 13C2-Succinate    | ***              | 0.000546566                                    |
| 13C3-Succinate    | ***              | 0.00069771                                     |
| 13C4-Succinate    | **               | 0.00218597                                     |
| 13C1-Fumarate     | ***              | 4.94266E-05                                    |
| 13C2-Fumarate     | ***              | 9.47052E-08                                    |
| 13C3-Fumarate     | ***              | 8.385E-12                                      |
| 13C4-Fumarate     | ***              | 3.1535E-09                                     |
| 13C1-Malate       | ***              | 2.37424E-05                                    |
| 13C2-Malate       | ***              | 1.97296E-07                                    |
| 13C3-Malate       | ***              | 6.0447E-08                                     |
| 13C4-Malate       | ***              | 2.33909E-08                                    |
| 13C1-Aspartate    | ***              | 6.72424E-08                                    |
| 13C2-Aspartate    | ***              | 7.3491E-11                                     |
| 13C3-Aspartate    | ***              | 9.183E-12                                      |
| 13C4-Aspartate    | ***              | 1.32059E-10                                    |
