# Supplementary material for: Inosine is an alternative carbon source for CD8+-T-cell function under glucose restriction
Source: PubMed Central journal article supplement (PMC7371628; doi:10.1038/s42255-020-0219-4), 2020-06-15

PNP

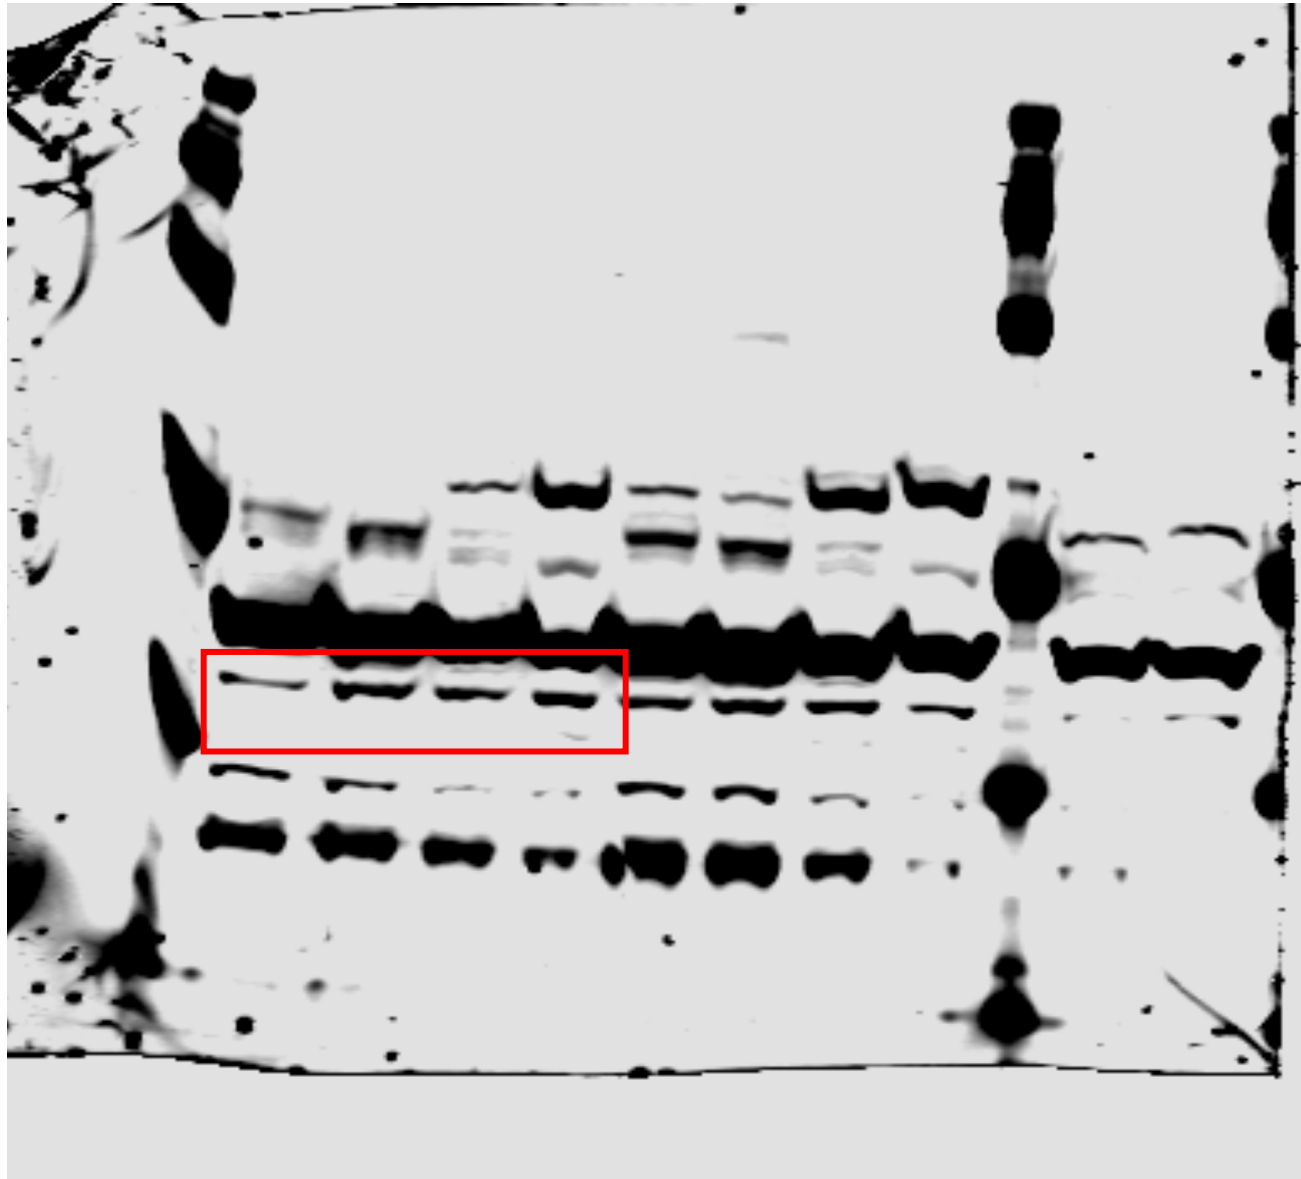

# Actin

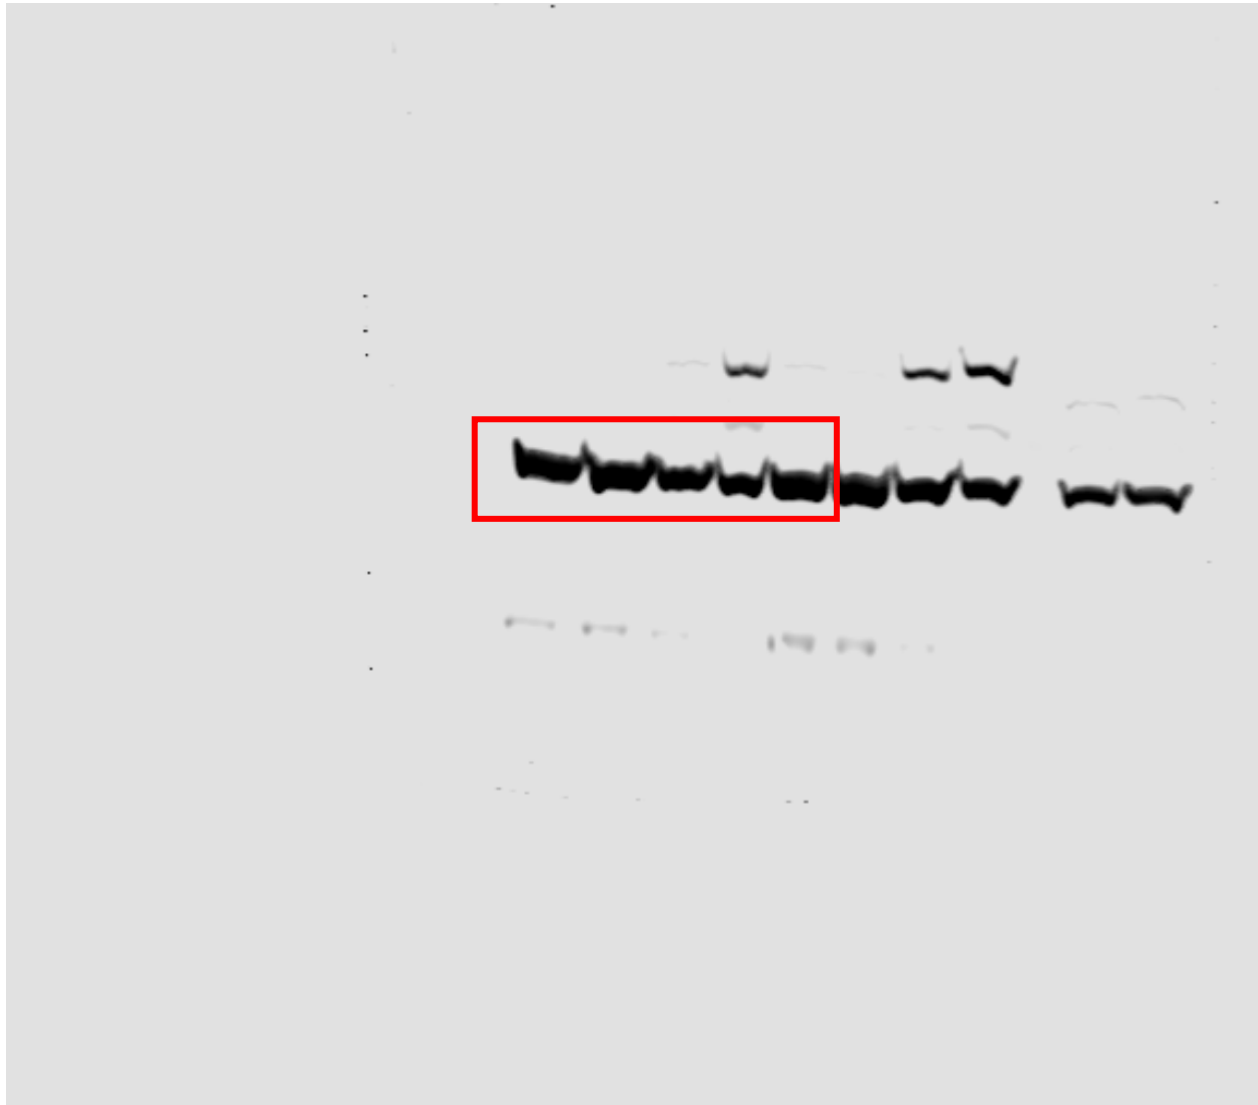

Supplement: 42255_2020_219_MOESM8_ESM.pdf [file 42255_2020_219_MOESM8_ESM.pdf]
