# Supplementary material for: Inosine is an alternative carbon source for CD8+-T-cell function under glucose restriction
Source: PubMed Central journal article supplement (PMC7371628; doi:10.1038/s42255-020-0219-4), 2020-06-15

81-11-5

...FUJIFILM SAFETY...

...FUJIFILM SAFETY...

...FUJIFILM SAFETY...

2/14/1980 gel 1

PNP

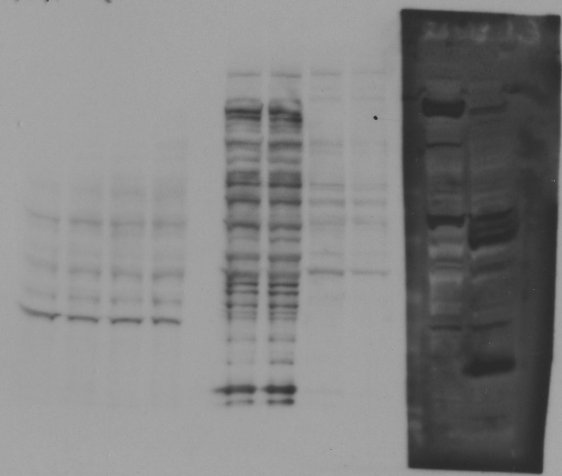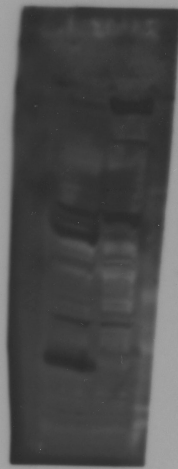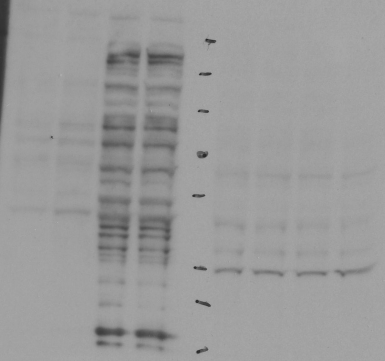

← PNP

gel 2

PNP

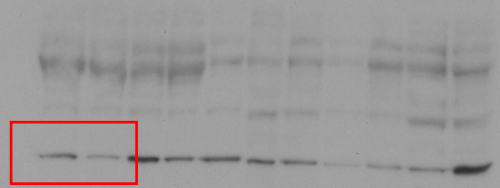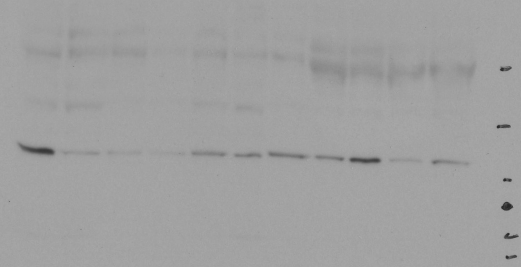

7.19.18  $\beta$ -actin

7.19.18  
gel 2

Actin

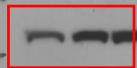

7.19.18 gel H

12

13

T  
P  
P

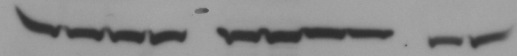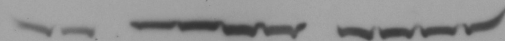

Supplement: 42255_2020_219_MOESM18_ESM.pdf [file 42255_2020_219_MOESM18_ESM.pdf]
