# Supplementary material for: Inosine is an alternative carbon source for CD8+-T-cell function under glucose restriction
Source: PubMed Central journal article supplement (PMC7371628; doi:10.1038/s42255-020-0219-4), 2020-06-15
Supplement: 42255_2020_219_MOESM21_ESM.pdf [file 42255_2020_219_MOESM21_ESM.pdf]

PNP

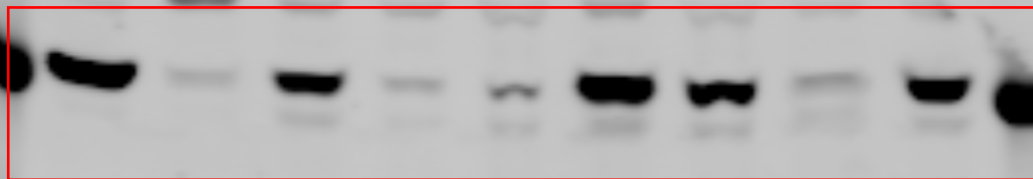

Actin

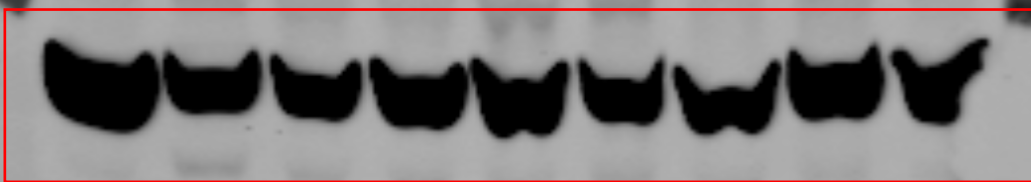

10-24-19

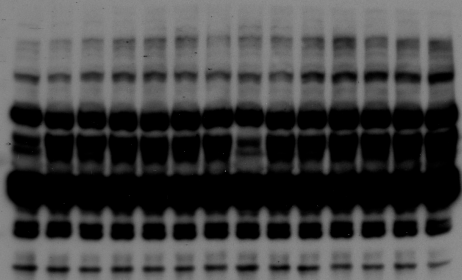

10/23/19 gel 1

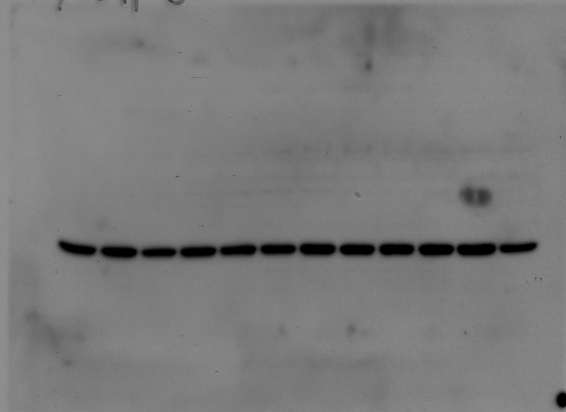

PNP

gel 2

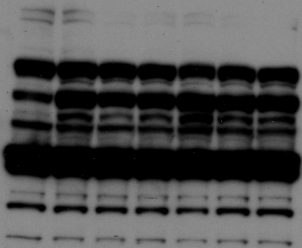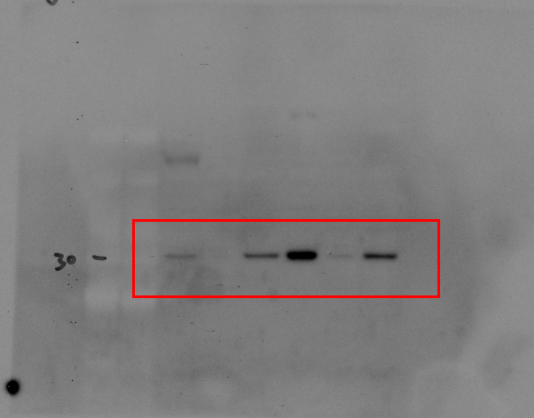

30 -

PNP

SAFETY SAFETY SAFETY



10-25-19

10/24/19 sel3

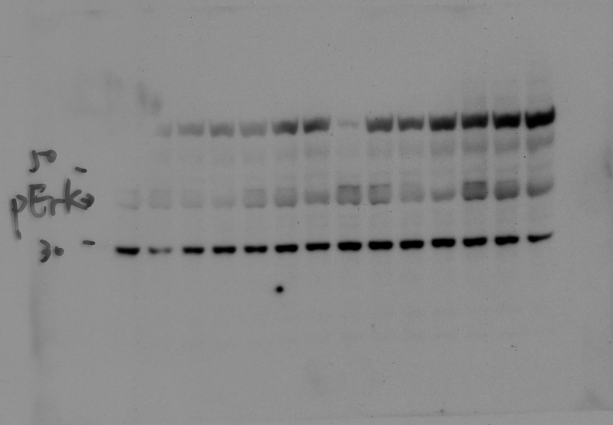

10/23/19 sel1

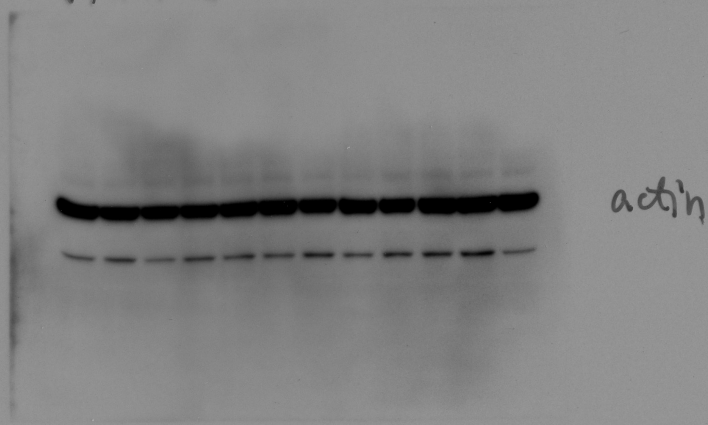

10/24/19 sel4.1

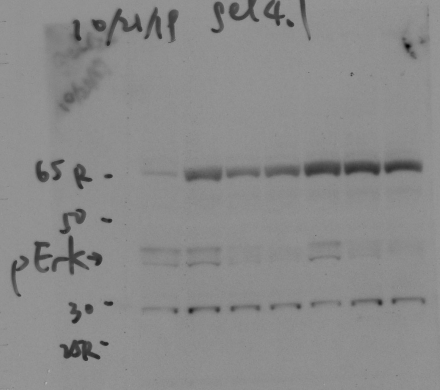

sel2

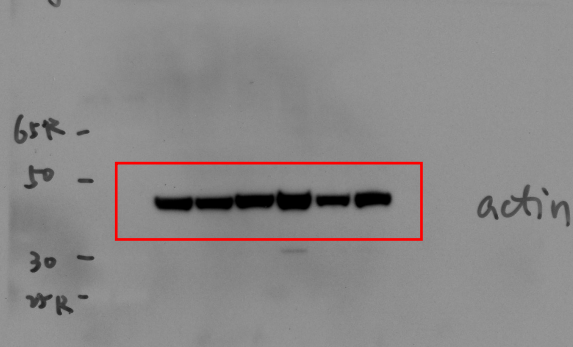



4-26-18  
4/24/18 2B sel 1

200 -  
150 -  
100 -  
75 -  
50 -  
37 -  
25 -

PNP

PNP

4-26-18  
4/24/18 2B

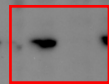

PNP

PNP

4-26-18

gel 4/24/182b

250 -  
150 -  
100 -  
75 -  
50 -  
37 -  
25 -

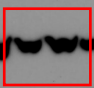

actin

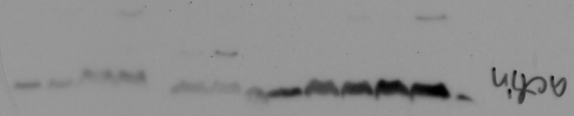

actin

...FUJI-HRC-(SAFEETY)...

XY

250 -  
150 -  
100 -  
75 -  
50 -  
37 -  
25 -

actin

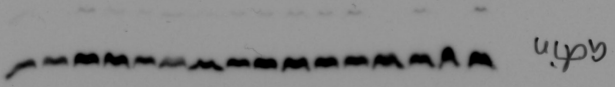

actin

...FUJI-HRC-(SAFEETY)...
